# Supplementary material for: Deubiquitylase OTUD3 Mediates Endoplasmic Reticulum Stress through Regulating Fortilin Stability to Restrain Dopaminergic Neurons Apoptosis
Source: MDPI journal article supplement (doi:10.3390/antiox12040809), 2023-03-26
Supplement: s1 [file s1]

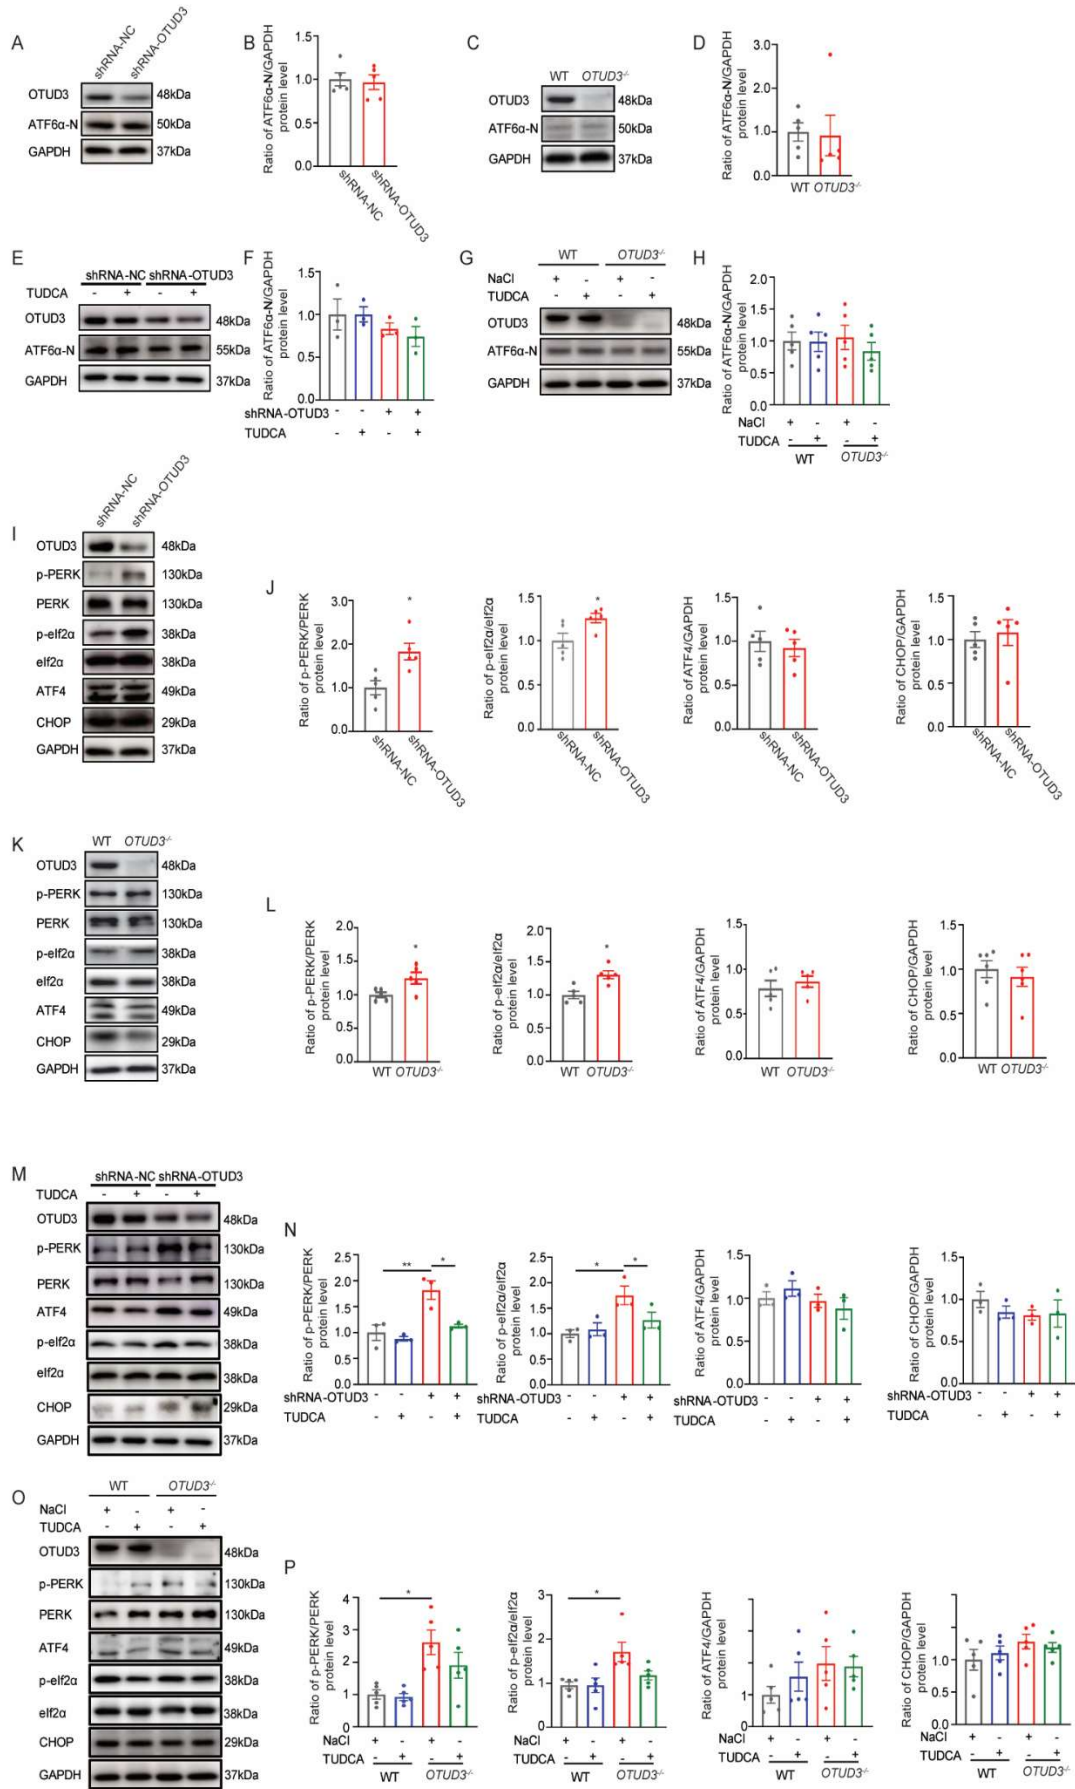

**Figure S1. 1 OTUD3 knockdown-induced ER stress was not depend on ATF6 $\alpha$  and PERK pathway** (a-d) Western blotting and statistical analysis of the expression of ATF6 $\alpha$ -N in OTUD3<sup>-/-</sup> mice and OTUD3 knockdown cells, n=5. (e-h) Immunoblotting and statistical analysis of the expression of ATF6 $\alpha$ -N proteins in OTUD3<sup>-/-</sup> mice (n=5) and OTUD3 knockdown cells (n=3) after TUDCA treatment, respectively. (i-l) Immunoblotting and statistical analysis of the expression of PERK pathway associated proteins in OTUD3<sup>-/-</sup> mice and OTUD3 knockdown cells, n=5. (m-p) Western blotting and statistical analysis of the expression of PERK pathway associated proteins in OTUD3<sup>-/-</sup> mice (n=5) and OTUD3 knockdown cells (n=3) after TUDCA treatment. Data were mean $\pm$ SEM, t- test, \* $P$ <0.05, \*\* $P$ <0.01.
